# Supplementary material for: Systemic analysis of lipid metabolism from individuals to multi-organism systems
Source: Royal Society of Chemistry journal article supplement (doi:10.1039/d4mo00083h), 2024-09-09
Supplement: d4mo00083h2.pdf [file d4mo00083h2.pdf]

## 1 Supplementary Figures

2

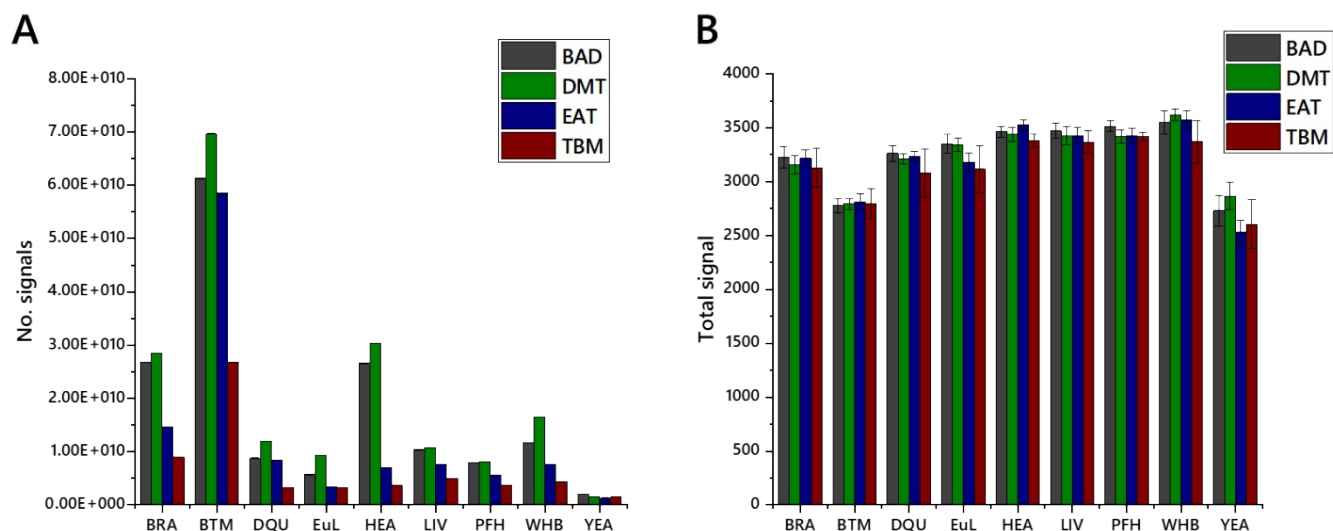

3

4

5 **Fig. S1. The performance of four lipid extraction methods on nine sample types.** Panel A, the total number of variables of  
6 unmatched  $m/z$  signals found for four extractions across nine sample types, that passed background and QC checks. Panel B, the  
7 total signal of all unmatched  $m/z$  signals found for four extractions across nine sample types, that passed background and QC  
8 checks. Samples were drawn from stock materials (see methods). BAD, Bligh & Dyer extraction applied to high throughput  
9 extraction<sup>1</sup>; DMT, dichloromethane-methanol-triethylammonium chloride<sup>2</sup>; EAT, ethyl acetate with triethylammonium chloride;  
10 TBM, *tert*-butylmethylether extraction, as described by Matyash *et al.*<sup>3</sup>. BRA, pooled brains from *Mus musculus*; BTM, milk from *Bos*  
11 *taurus*; DQU, whole pooled *Desmodemus quadricauda*; EuL, leaves from *Eucalyptus perriniana*; HEA, pooled hearts from *Mus*  
12 *musculus*; LIV, pooled livers from *Mus musculus*; PFH, polyfloral pollen; WHB, whole *Bombus terrestris*, pooled; YEA, *Saccharomyces*  
13 *cerevisiae* BY 4743. Error bars represent standard deviation based on 10 measurements.

14

15

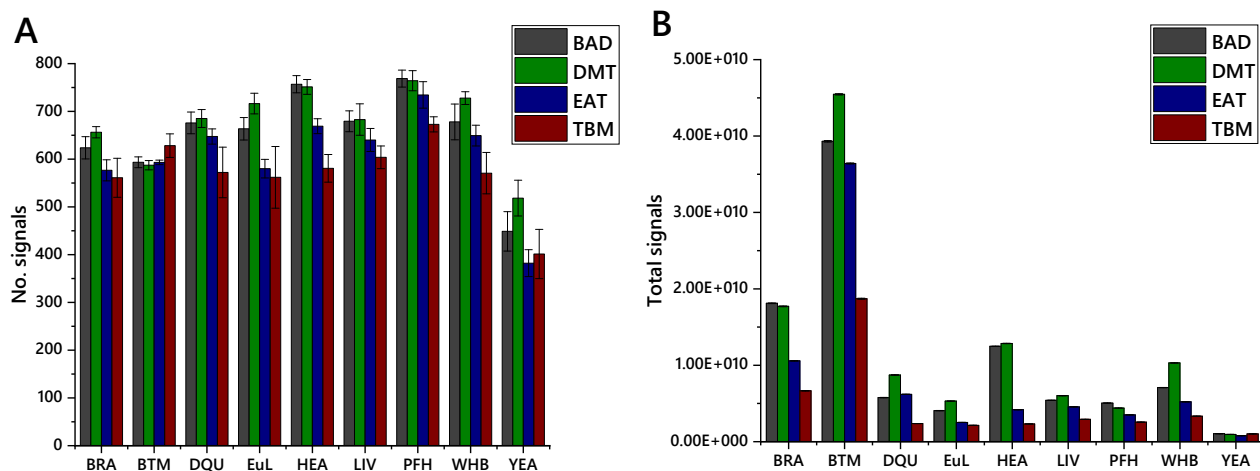

16  
17

18 **Fig. S2. The performance of four lipid extraction methods on nine sample types, processed using a target library.** Panel A, the total  
19 number of variables of matched  $m/z$  signals found for four extractions across nine sample types, that passed background and QC  
20 checks. Panel B, the total signal of all matched  $m/z$  signals found for four extractions across nine sample types, that passed  
21 background and QC checks. Samples were drawn from stock materials (see methods). BAD, Bligh & Dyer extraction (high  
22 throughput extraction); DMT, dichloromethane-methanol-triethylammonium chloride<sup>2</sup>; EAT, ethyl acetate with triethylammonium  
23 chloride; TBM, *tert*-butylmethylether extraction, as described by Matyash *et al.*<sup>3</sup>. BRA, pooled brains from *Mus musculus*; BTM, milk  
24 from *Bos taurus*; DQU, whole pooled *Desmodesmus quadricauda*; EuL, leaves from *Eucalyptus perriniana*; HEA, pooled hearts from  
25 *Mus musculus*; LIV, pooled livers from *Mus musculus*; PFH, polyfloral pollen; WHB, whole *Bombus terrestris*, pooled; YEA,  
26 *Saccharomyces cerevisiae* BY 4743.

27  
28

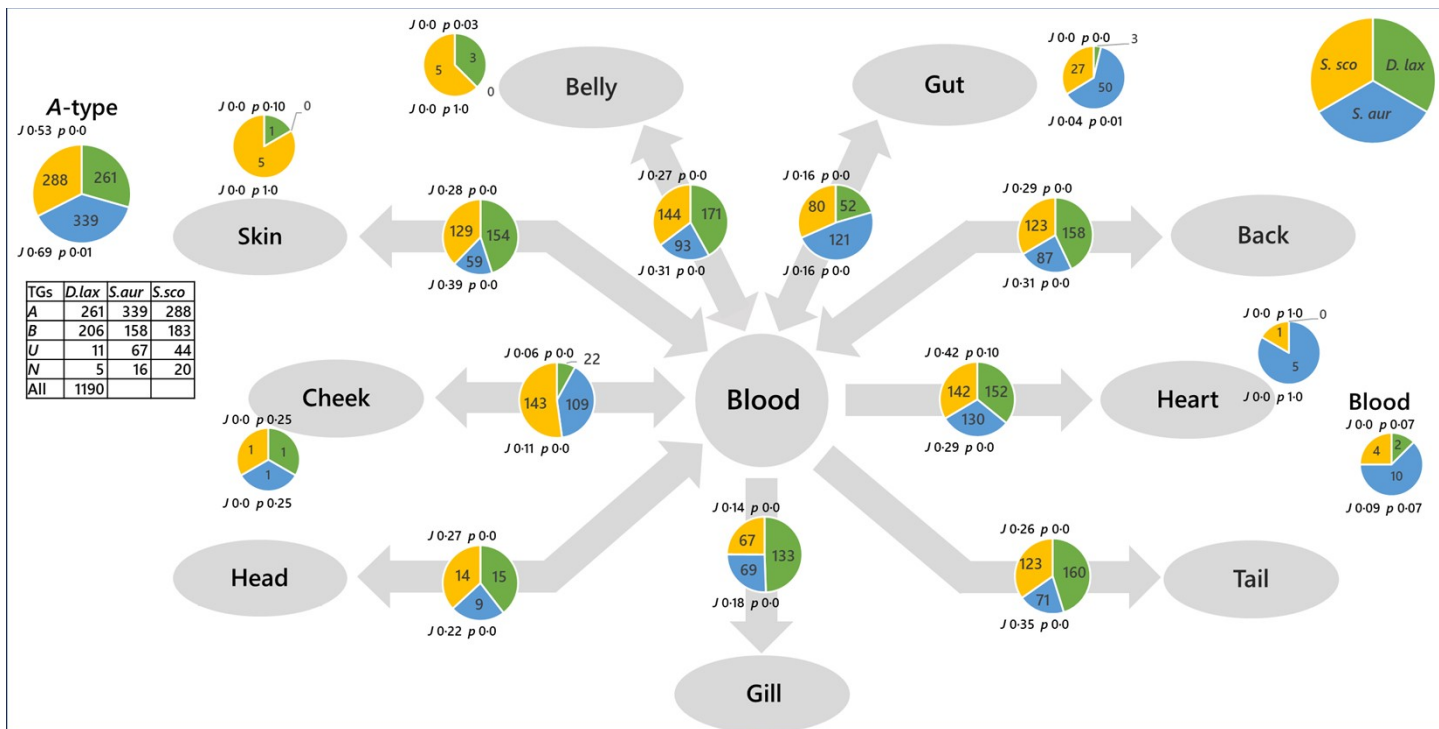

29  
30

31 **Fig. S3. A switch analysis of triglycerides in *Dicentrarchus labrax* (seabass) against *Sparus aurata* (bream) and *Scomber scombrus***  
 32 **(mackerel). The pie chart in the top left shows the number of ubiquitous lipid variables for that network, for each phenotype (A-**  
 33 **type variables). Pie charts on arrows represent variables found in the two adjacent compartments (B-type variables). Smaller pie**  
 34 **charts represent isolated variables (U-type). *J* represents the Jaccard-Tanimoto coefficient for the comparison, with accompanying**  
 35 ***p* value, as a measure of the similarity between the variables identified in the two phenotypes for each comparison. The *p* value**  
 36 **shown represents the probability that the difference between the lists of variables for the two phenotypes occurred by random**  
 37 **chance. TGs include all adducts of whole TGs and the DGs arising from in-source fragmentation of TGs during data collection.**  
 38

### A. TGs

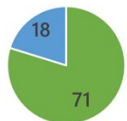

| TGs | FAG | HEL |
|-----|-----|-----|
| A   | 71  | 18  |
| B   | 298 | 256 |
| U   | 123 | 76  |
| N   | 88  | 31  |
| All | 914 |     |

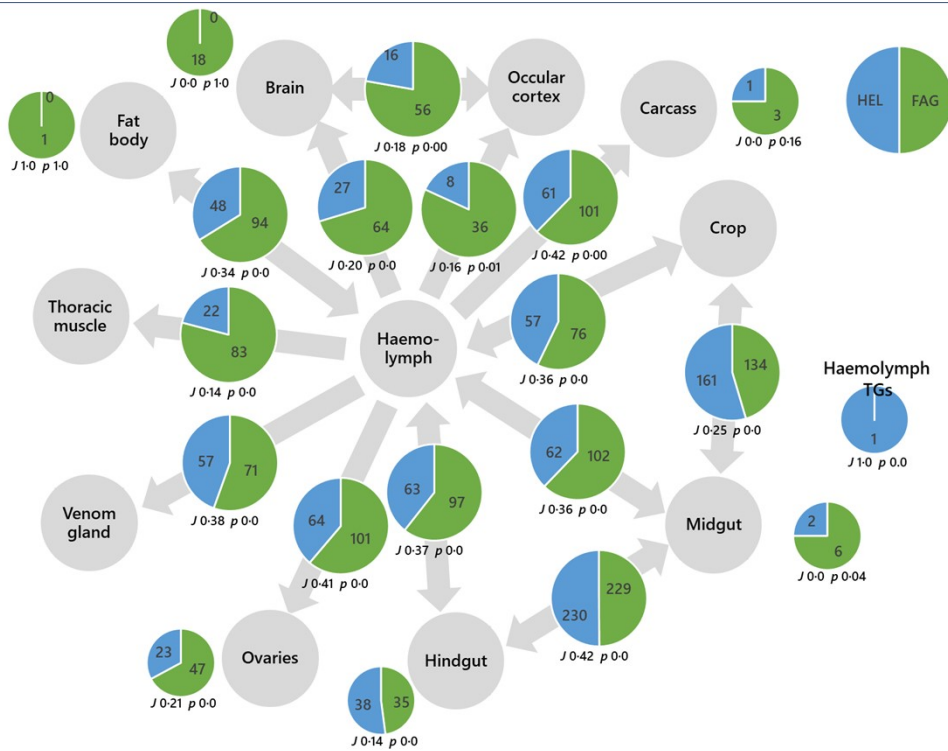

39  
40

### B. PCs

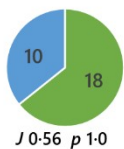

| PCs | FAG | HEL |
|-----|-----|-----|
| A   | 18  | 10  |
| B   | 26  | 21  |
| U   | 4   | 4   |
| N   | 3   | 3   |
| All | 72  |     |

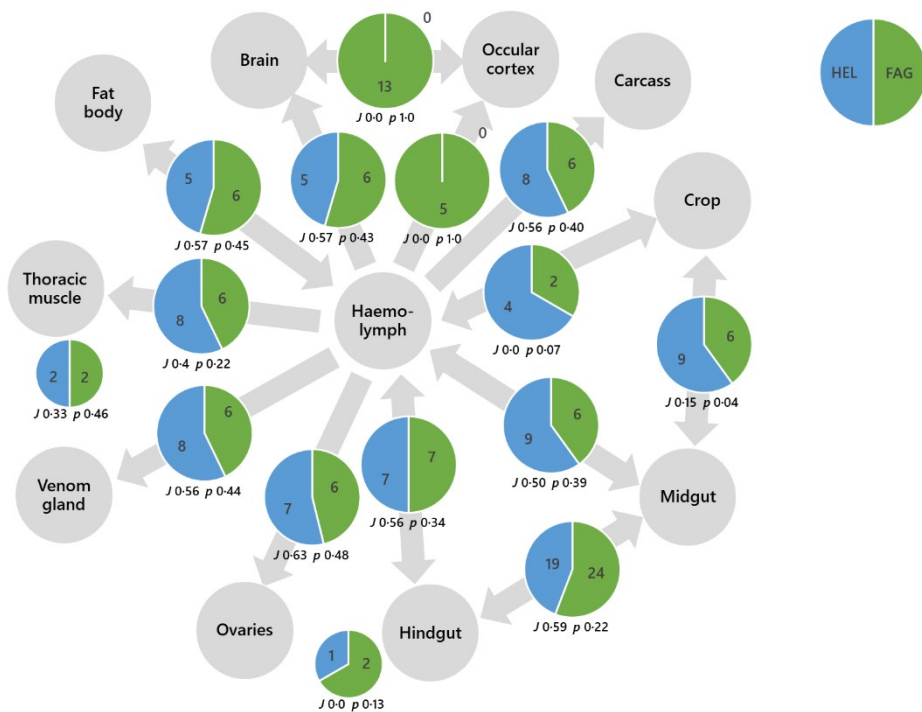

41

### C. PIs

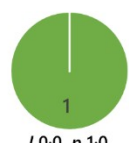

| PIs | FAG | HEL |
|-----|-----|-----|
| A   | 1   | 0   |
| B   | 22  | 26  |
| U   | 9   | 3   |
| N   | 2   | 0   |
| All | 52  | 0   |

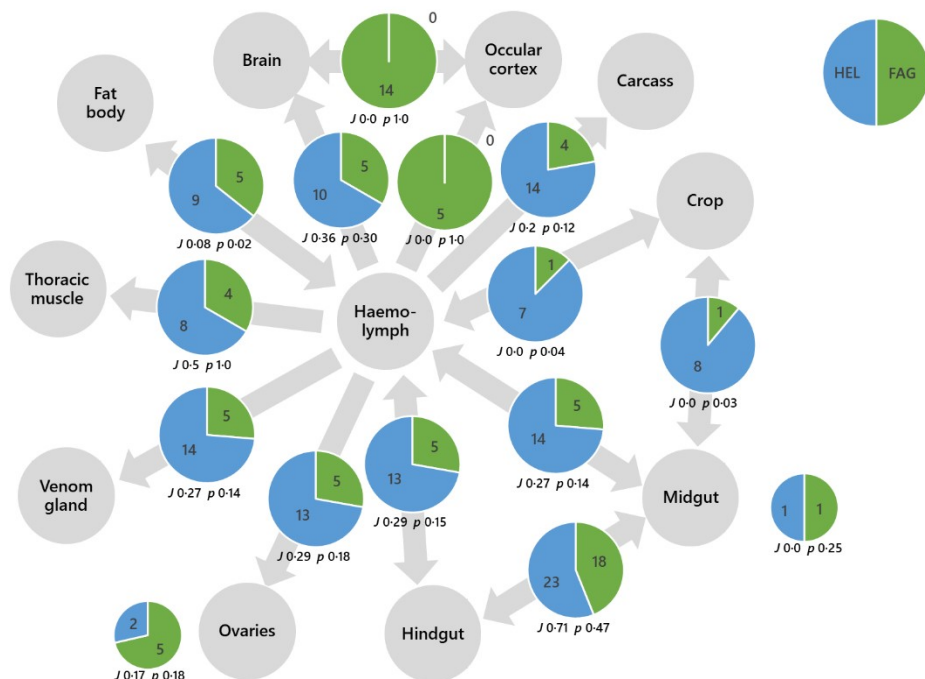

42  
43

### D. PGs

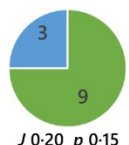

| PGs | FAG | HEL |
|-----|-----|-----|
| A   | 9   | 3   |
| B   | 20  | 14  |
| U   | 6   | 0   |
| N   | 3   | 2   |
| All | 49  | 2   |

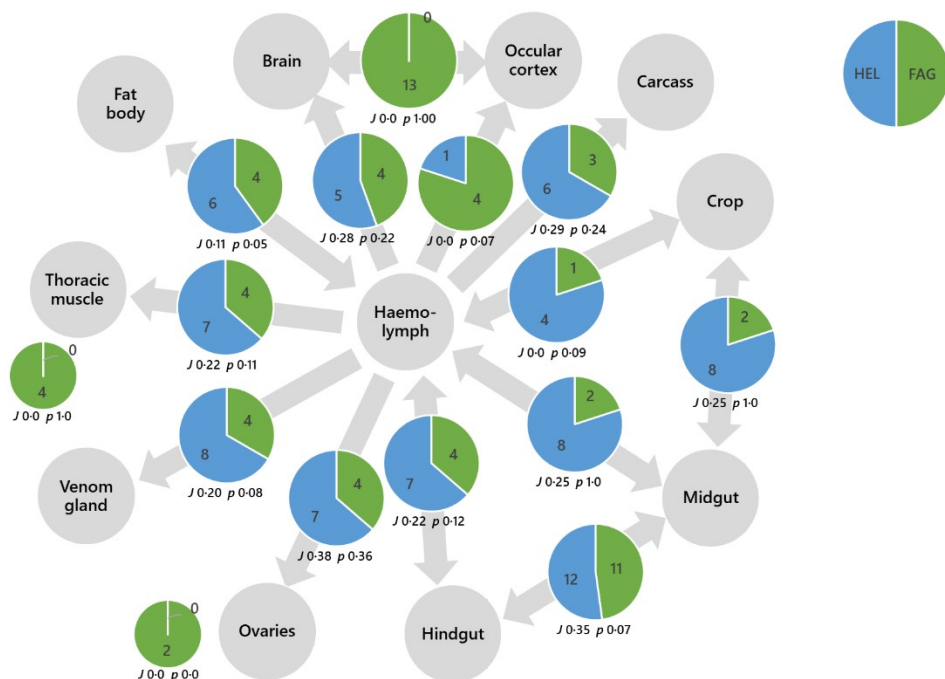

44  
45

**Fig. S4. Switch analyses of phospholipid and triglyceride variables in Queen *Bombus terrestris* bees fed either *Fagopyrum tataricum* (FAG) or *Helianthus annuus* (HEL) pollen.** Panel **A**, Switch Analysis of triglycerides; **B**, Switch Analysis of phosphatidylcholines; **C**, Switch Analysis of phosphatidylinositols; **D**, Switch Analysis of phosphatidylglycerols. The pie chart in the top right shows the number of ubiquitous lipid variables for that network, for each phenotype (**A**-type variables). Larger pie charts (on the arrows) represent variables found in the two adjacent compartments (**B**-type variables). Smaller pie charts represent isolated variables (**U**-type). *J* represents the Jaccard-Tanimoto coefficient for the comparison, with accompanying *p* value, as a measure of the similarity between the variables identified in the two phenotypes for each comparison. The *p* value shown represents the probability that the difference between the lists of variables for the two phenotypes occurred by random chance.

54

## A. PIs

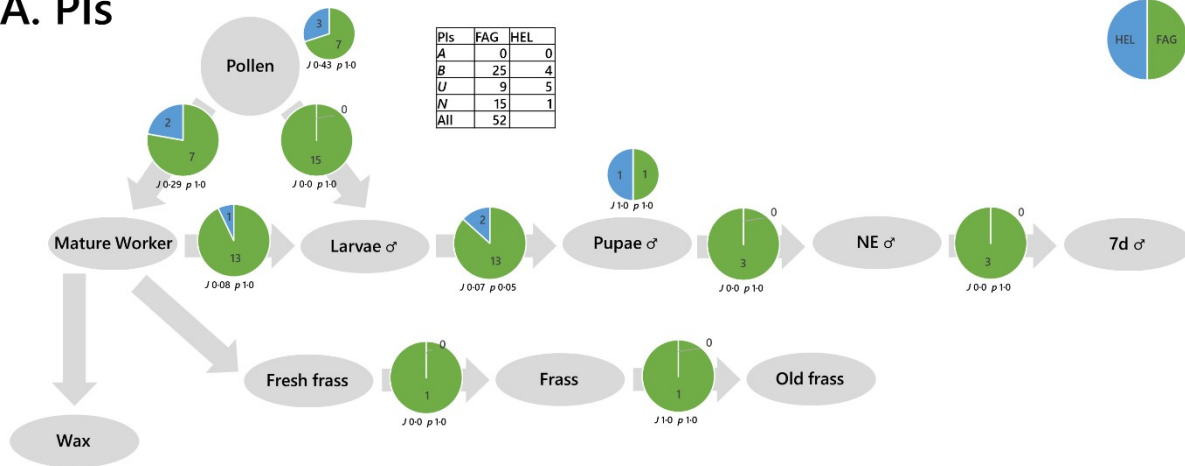

55  
56

## B. PGs

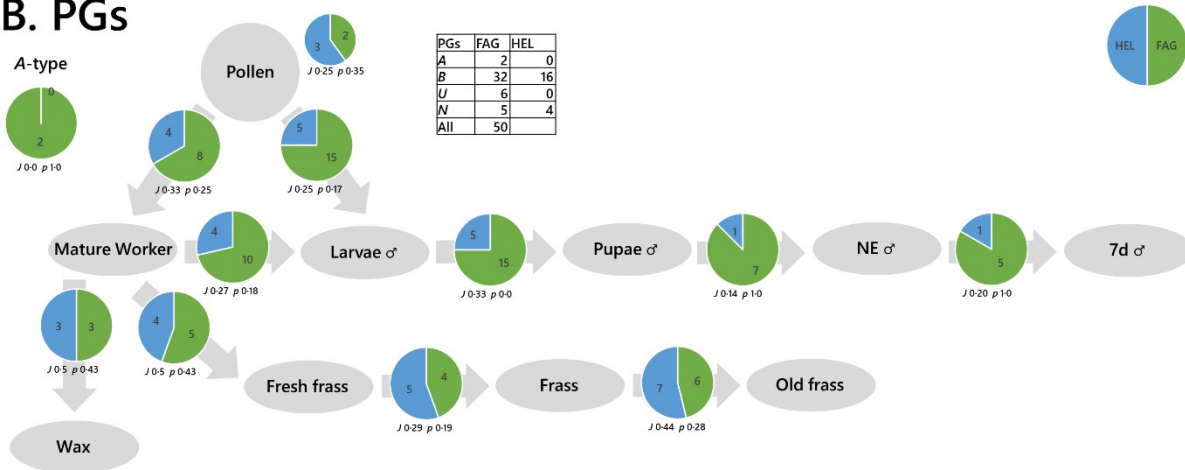

57  
58  
59  
60  
61  
62  
63  
64  
65  
66

**Fig. S5. Switch analyses of phospholipid and triglyceride variables in *Bombus terrestris* colonies fed either *Fagopyrum tataricum* (FAG) or *Helianthus annuus* (HEL) pollen.** Panel **A**, Phosphatidylinositols; **B**, Phosphatidylglycerols. The pie chart in the top right shows the number of ubiquitous lipid variables for that network, for each phenotype (**A**-type variables). Larger pie charts (on the arrows) represent variables found in the two adjacent compartments (**B**-type variables). Smaller pie charts represent isolated variables (**U**-type). *J* represents the Jaccard-Tanimoto coefficient for the comparison, with accompanying *p* value, as a measure of the similarity between the variables identified in the two phenotypes for each comparison. The *p* value shown represents the probability that the difference between the lists of variables for the two phenotypes occurred by random chance.

67 TABLES

68

69 <<see excel spreadsheet, attached>>

70

71 **Table S1. Sample list and preparation of tissues used in the present study.** The purpose of the ratio is to give a chemically and  
72 biologically stable, pipettable solution in which 1-5 µg of lipid can be transferred in 5-60 µL liquid. <sup>1</sup>Ratio of GCTU to fresh weight  
73 (=1). This is provided as a guide, tissues with more/less fatty material may need different ratios of buffer to sample; <sup>2</sup>Material added  
74 to 1 mL of GCTU dispersion; <sup>3</sup>samples were freeze-dried before mechanical disruption/dispersion with a hand-held homogeniser, see  
75 instructions; <sup>4</sup>Samples stored at 5°C for a week before homogenisation. Pooled stocks used in the present study represent  
76 homogenates from at least 10 individuals. Pollen not marked as fresh was collected by bees.

77

| CV         | <i>D. quad.</i><br>(whole) | <i>Eucalyptus</i><br><i>per.</i> (leaf) | Polyfloral<br>pollen | <i>Bombus</i><br><i>terrestris</i><br>(whole) | <i>Saccharomyce</i><br><i>s cerevisiae</i><br>(whole) | <i>Mus musculus</i><br>(brain) | <i>Mus musculus</i><br>(heart) | <i>Mus musculus</i><br>(liver) | <i>Bos taurus</i><br>(milk) | Sum  |
|------------|----------------------------|-----------------------------------------|----------------------|-----------------------------------------------|-------------------------------------------------------|--------------------------------|--------------------------------|--------------------------------|-----------------------------|------|
| <b>30%</b> |                            |                                         |                      |                                               |                                                       |                                |                                |                                |                             |      |
| <b>BAD</b> | 328                        | 306                                     | 753                  | 493                                           | 270                                                   | 509                            | 603                            | 594                            | 242                         | 4098 |
| <b>DMT</b> | 293                        | 239                                     | 653                  | 450                                           | 341                                                   | 535                            | 570                            | 381                            | 349                         | 3811 |
| <b>EAT</b> | 383                        | 437                                     | 751                  | 581                                           | 279                                                   | 616                            | 757                            | 449                            | 374                         | 4627 |
| <b>TBM</b> | 70                         | 152                                     | 811                  | 257                                           | 193                                                   | 288                            | 319                            | 480                            | 177                         | 2747 |
| <b>20%</b> |                            |                                         |                      |                                               |                                                       |                                |                                |                                |                             |      |
| <b>BAD</b> | 69                         | 109                                     | 278                  | 146                                           | 85                                                    | 162                            | 206                            | 208                            | 88                          | 1351 |
| <b>DMT</b> | 54                         | 51                                      | 314                  | 167                                           | 111                                                   | 236                            | 227                            | 87                             | 136                         | 1383 |
| <b>EAT</b> | 120                        | 190                                     | 341                  | 205                                           | 89                                                    | 250                            | 228                            | 92                             | 154                         | 1669 |
| <b>TBM</b> | 9                          | 36                                      | 398                  | 48                                            | 46                                                    | 57                             | 61                             | 131                            | 33                          | 819  |
| <b>15%</b> |                            |                                         |                      |                                               |                                                       |                                |                                |                                |                             |      |
| <b>BAD</b> | 12                         | 41                                      | 121                  | 44                                            | 25                                                    | 48                             | 67                             | 69                             | 32                          | 459  |
| <b>DMT</b> | 8                          | 13                                      | 172                  | 71                                            | 33                                                    | 108                            | 96                             | 18                             | 41                          | 560  |
| <b>EAT</b> | 32                         | 76                                      | 184                  | 97                                            | 33                                                    | 120                            | 60                             | 19                             | 63                          | 684  |
| <b>TBM</b> | 1                          | 8                                       | 225                  | 23                                            | 25                                                    | 25                             | 15                             | 36                             | 8                           | 366  |

78

79 **Table S2. The number of variables with a coefficient of variation below three thresholds. Signals are unmatched *m/z* signals of**  
80 **isolates of four extractions across nine sample types that passed background and QC checks.** Samples drawn from stock materials  
81 (see methods). BAD, Bligh & Dyer extraction applied to high throughput extraction<sup>1</sup>; DMT, dichloromethane-methanol-  
82 triethylammonium chloride<sup>2</sup>; EAT, ethyl acetate with triethylammonium chloride; TBM, *tert*-butylmethylether extraction<sup>3</sup>.  
83



| CV         | <i>D. quad.</i><br>(whole) | <i>Eucalyptus</i><br><i>per.</i> (leaf) | Polyfloral<br>pollen | <i>Bombus</i><br><i>terrestris</i><br>(whole) | <i>Saccharomyce</i><br><i>s cerevisiae</i><br>(whole) | <i>Mus musculus</i><br>(brain) | <i>Mus musculus</i><br>(heart) | <i>Mus musculus</i><br>(liver) | <i>Bos taurus</i><br>(milk) | Sum  |
|------------|----------------------------|-----------------------------------------|----------------------|-----------------------------------------------|-------------------------------------------------------|--------------------------------|--------------------------------|--------------------------------|-----------------------------|------|
| <b>30%</b> |                            |                                         |                      |                                               |                                                       |                                |                                |                                |                             |      |
| <b>BAD</b> | 90                         | 82                                      | 90                   | 178                                           | 153                                                   | 125                            | 144                            | 142                            | 80                          | 1084 |
| <b>DMT</b> | 96                         | 78                                      | 105                  | 193                                           | 126                                                   | 133                            | 91                             | 172                            | 120                         | 1114 |
| <b>EAT</b> | 114                        | 107                                     | 89                   | 193                                           | 144                                                   | 132                            | 117                            | 157                            | 123                         | 1176 |
| <b>TBM</b> | 20                         | 31                                      | 74                   | 185                                           | 108                                                   | 74                             | 103                            | 67                             | 44                          | 706  |
| <b>20%</b> |                            |                                         |                      |                                               |                                                       |                                |                                |                                |                             |      |
| <b>BAD</b> | 51                         | 56                                      | 63                   | 117                                           | 104                                                   | 93                             | 98                             | 107                            | 58                          | 747  |
| <b>DMT</b> | 57                         | 44                                      | 73                   | 138                                           | 88                                                    | 103                            | 46                             | 120                            | 88                          | 757  |
| <b>EAT</b> | 87                         | 78                                      | 67                   | 155                                           | 116                                                   | 103                            | 72                             | 118                            | 88                          | 884  |
| <b>TBM</b> | 9                          | 17                                      | 58                   | 142                                           | 54                                                    | 49                             | 75                             | 34                             | 33                          | 471  |
| <b>15%</b> |                            |                                         |                      |                                               |                                                       |                                |                                |                                |                             |      |
| <b>BAD</b> | 2                          | 17                                      | 16                   | 35                                            | 25                                                    | 23                             | 35                             | 28                             | 22                          | 203  |
| <b>DMT</b> | 5                          | 4                                       | 24                   | 40                                            | 37                                                    | 40                             | 6                              | 31                             | 30                          | 217  |
| <b>EAT</b> | 25                         | 22                                      | 5                    | 54                                            | 30                                                    | 33                             | 57                             | 14                             | 23                          | 263  |
| <b>TBM</b> | 1                          | 5                                       | 26                   | 56                                            | 4                                                     | 5                              | 22                             | 8                              | 3                           | 130  |

84

85 **Table S3. The number of variables with a coefficient of variation below three thresholds. Signals are Lipid-ID matched *m/z* signals**  
86 **of isolates of four extractions across nine sample types that passed background and QC checks. Samples drawn from stock**  
87 **materials (see methods). BAD, Bligh & Dyer extraction applied to high throughput extraction<sup>1</sup>; DMT, dichloromethane-methanol-**  
88 **triethylammonium chloride<sup>2</sup>; EAT, ethyl acetate with triethylammonium chloride; TBM, *tert*-butylmethylether extraction<sup>3</sup>.**

89

90

91

|    | Lipid     | Expected mass (mg) | Concentration (nM) | <i>m/z</i> (+ve ionis. Mode, +H+) | <i>m/z</i> (+ve ionis. Mode, +NH4+) | <i>m/z</i> (+ve ionis. Mode, +Na+) |
|----|-----------|--------------------|--------------------|-----------------------------------|-------------------------------------|------------------------------------|
| 1  | LPC       | 1                  | 1.889              | 529.3989                          | -                                   | 551.3811                           |
| 2  | SM        | 1                  | 1.361              | <b>734.7684</b>                   | -                                   | 756.7506                           |
| 3  | PE        | 10                 | 13.356             | 748.7241                          | -                                   | 770.7067                           |
| 4  | PS        | 10                 | 12.615             | 792.7140                          | -                                   | 814.6965                           |
| 5  | PI        | 1                  | 1.204              | 830.5767                          | 847.6030                            | <b>852.5583</b>                    |
| 6  | PC        | 10                 | 11.641             | 859.06                            | -                                   | 881.0383                           |
| 7  | TG(light) | 1                  | 1.232              | -                                 | 771.7224                            | 776.6774                           |
| 8  | TG(heavy) | 1                  | 1.327              | -                                 | 829.7979                            | 834.7527                           |
| 9  | DGDG*     | 10                 | 13.268             | 949.6827                          | 966.7093                            | 971.6647                           |
| 10 | MGDG*     | 10                 | 13.268             | 759.5986                          | 776.6252                            | 781.5806                           |

92

93 **Table S4. The Internal Standards used.** Standards were labelled with at least 6 deuterium atoms and used without purification. \*Not  
94 deuterated.

95

96
