# Supplementary material for: Systemic analysis of lipid metabolism from individuals to multi-organism systems
Source: Mol Omics. 2024 Sep 9;20(9):570–83. doi: 10.1039/d4mo00083h (PMC11381968; doi:10.1039/d4mo00083h)
Supplement: MO-020-D4MO00083H-s003 [file MO-020-D4MO00083H-s003.xlsx]

## Sheet: Sheet1
Kingdom/phylum	Species	Tissue	GCTU ratio1	Further dilution2	Extraction Inj. vol. (µL)	Notes
Mammalia	Mus musculus	Brain	4.5	n/a	30	Pooled
		Liver	5	n/a	10	Pooled
		Adipose	8	CH3OH (400 µL), TBME (100 µL)	3	Pooled
		Heart2	10	n/a	60	Pooled
		Heart2	10	n/a	60	One individual
		Liver	5	n/a	12	One individual
		Stomach	10	n/a	20	One individual
		Spleen	10	n/a	20	One individual
		Lung	10	n/a	20	One individual
		Fat	20	n/a	10	One individual
		Skin	10	n/a	20	One individual
		Small intestine		n/a	20	One individual
	Homo sapiens	Whole blood	n/a	n/a	30
		Blood plasma	n/a	n/a	30
Insecta	Apis mellifera (fresh)	Whole bees3	25	n/a	60
		Brain	50	n/a	20
		Eye	50	n/a	20	With ocular cortex
		Fatbody	50	n/a	10
		Gut	50	n/a	20
		HPG	50	n/a	20	Pooled
	Apis mellifera (aged4)	Whole bees3	25	n/a	60
		Brain	50	n/a	20
		Eye	50	n/a	20	With ocular cortex
		Fatbody	50	n/a	20
		Gut	50	n/a	20
		HPG	50	n/a	20	Pooled
		Larvae	50	n/a	30
		Pupae	50	n/a	60
	Bombus terrestris	Whole bees3	25	n/a	60
		Brain	50	n/a	20
		Eye	50	n/a	20	With ocular cortex
		Fat body	50	n/a	20
		Gut	50	n/a	20
	Bombus terrestris (Queen)	Brain	50	n/a	20
		Crop	50	n/a	20
		Fatbody	50	n/a	20
		Haemolymph	50	n/a	60
		Hind-gut	50	n/a	20
		Mid-gut	50	n/a	20
		Eye	50	n/a	20	With ocular cortex
		Ovaries	50	n/a	20
		Thoracic muscle	50	n/a	60
		Venom sac	50	n/a	20
		Carcass	25	n/a	20	All material remaining after dissection
Actinopterygii (ray-finned fish)	Dicentrarchus labrax	Back	10	n/a	20
		Belly	10	n/a	20
		Blood	3	n/a	20
		Cheek	10	n/a	20
		Gill	10	n/a	20
		Gut	10	n/a	20
		Head	10	n/a	20
		Heart	10	n/a	60
		Skin	10	n/a	20	Comprised subcutaneous fat
		Tail	10	n/a	20
		Liver	10	n/a	20
	Sparus aurata	Back	10	n/a	20
		Belly	10	n/a	20
		Blood	3	n/a	20
		Cheek	10	n/a	20
		Gill	10	n/a	20
		Gut	10	n/a	20
		Head	10	n/a	20
		Heart	10	n/a	60
		Skin	10	n/a	20	Comprised subcutaneous fat
		Tail	10	n/a	20
		Liver	10	n/a	20
	Scomber scombrus	Back	10	n/a	20
		Belly	10	n/a	20
		Blood	3	n/a	20
		Cheek	10	n/a	20
		Gill	10	n/a	20
		Gut	10	n/a	20
		Head	10	n/a	20
		Heart	10	n/a	60
		Skin	10	n/a	20	Comprised subcutaneous fat
		Tail	10	n/a	20
Fungi	Saccharomyces cerevisiae3	BY4743	20	n/a	30	Ratio based on fresh weight
		ERG3	30	n/a	30
Plantae	Dianthus caryophyllus3 (Carnation)	Petal	10	n/a	60
		Leaf	10	n/a	60
		Sap	1	n/a	20
	Eucalyptus perriniana3	Leaf	10	n/a	60
		Seed	10	n/a	60	Collected from mature capsids after freeze-drying
	Rhododendron ferrugineum3	Leaf	10	n/a	60
		Bud	10	n/a	60
	Camellia reticulata3	Leaf	10	n/a	60
		Bud	10	n/a	60
	Alnus spp.	Pollen (fresh)	25	n/a	30
	Castenea sativa	Pollen	25	n/a	30
	Fagopyrum esculentum	Pollen	25	n/a	30
	Helianthus annuus	Pollen	25	n/a	30
	Lilium spp.	Pollen (fresh)	25	n/a	30
	Nymphae spp.	Pollen	25	n/a	30
	Papaver rhoeas	Pollen	25	n/a	30
	Salix spp.	Pollen (fresh)	25	n/a	30
	Polyfloral pollen 1	Pollen	25	n/a	30
	Polyfloral pollen 2	Pollen	25	n/a	30	Collected and stored by bees
	Salvia hispanica3	Seed	25	n/a	20
	Sesamum indica3	Seed	25	n/a	20
	Linum usitatissimum3	Seed	25	n/a	20
	Pinus armandii3	Seed	25	n/a	20
	Palmaria palmata	Whole	12	n/a	20
	Himanthalia elongata	Whole	12	n/a	20
	Capsicum annuum3	Fruit flesh	25	n/a	60
Archaeplastida (algae)	Chlamydomonas rheinhardii3	Whole		n/a	60
	Desmodesmus quadricauda3	Whole		n/a	60
	Galdieria sulphuraria3	Whole		n/a	60
	Hibberdia magna3	Whole		n/a	60
Soil	Mixed, temperate zone, outside	Whole		n/a	200
	Mixed, humid tropical glasshouse	whole		n/a	200
