# Supplementary material for: Systemic analysis of lipid metabolism from individuals to multi-organism systems
Source: Mol Omics. 2024 Sep 9;20(9):570–83. doi: 10.1039/d4mo00083h (PMC11381968; doi:10.1039/d4mo00083h)
Supplement: MO-020-D4MO00083H-s004 [file MO-020-D4MO00083H-s004.xlsx]

## Sheet: ISs PL-TG_Jan2023 bottle 2-2onl
	Lipid	Expected mass (mg)	Concentration (nM)	m/z (+ve ionis. Mode, +H+)	m/z (+ve ionis. Mode, +NH4+)	m/z (+ve ionis. Mode, +Na+)
1	LPC	1	1.88893	529.399	-	551.381
4	SM	1	1.36097	734.768	-	756.751
5	PE	10	13.3561	748.724	-	770.707
3	PS	10	12.6149	792.714	-	814.697
2	PI	1	1.20398	830.577	847.603	852.558
6	PC	10	11.6407	859.056	-	881.038
7	TG(light)	1	1.23188	-	771.722	776.677
8	TG(heavy)	1	1.32681	-	829.798	834.753
9	DGDG	10	13.2681	949.683	966.709	971.665
10	MGDG	10	13.2681	759.599	776.625	781.581
